# Supplementary material for: Two-dimensional Cd(ii) coordination polymer encapsulated by Tb3+ as a reversible luminescent probe for Fe3+
Source: Royal Society of Chemistry journal article supplement (doi:10.1039/c9ra06639j), 2019-01-01
Supplement: c9ra06639j1.pdf [file c9ra06639j1.pdf]

## Supporting Information

# Two-dimensional Cd(II) coordination polymer encapsulated by Tb<sup>3+</sup> as a reversible luminescent probe for Fe<sup>3+</sup>

Yuandi Wu,<sup>a</sup> Meihua Lin,<sup>a</sup> Dongyang Liu,<sup>a</sup> Ming Liu,<sup>a</sup> Jing Qian,<sup>a\*,b,c</sup>

---

Corresponding authors: a\* [qianjinger@aliyun.com](mailto:qianjinger@aliyun.com) (J. Qian)

**a** College of Chemistry, Tianjin Normal University, Tianjin 300387, P. R. China

**b** Tianjin Key Laboratory of Structure and Performance for Functional Molecules, Tianjin Normal University, Tianjin 300387, P. R. China

**c** Key Laboratory of Inorganic–Organic Hybrid Functional Materials Chemistry, Tianjin Normal University, Ministry of Education, Tianjin 300387, P. R. China

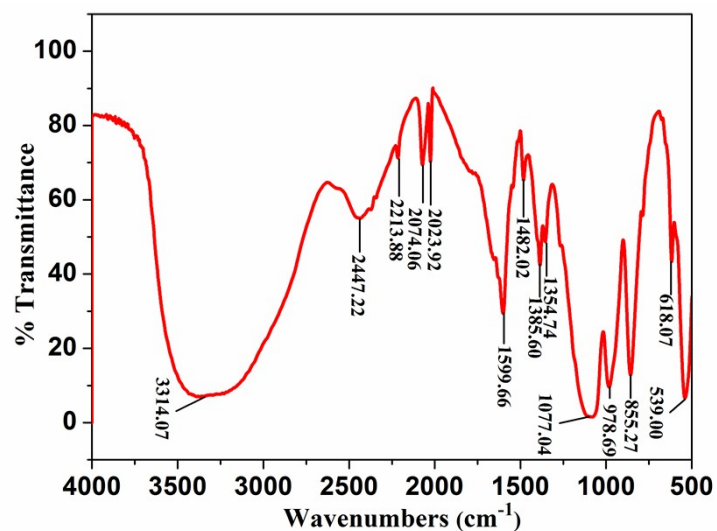

Fig. S1 FTIR patterns for Cd-P.

Table S1 Crystal data and structure refinement information for Cd-P.

| polymer                         | Cd-P                                                        |
|---------------------------------|-------------------------------------------------------------|
| CCDC                            | 1881136                                                     |
| Formula                         | $\text{Cd}_{0.50}\text{C}_{12}\text{H}_8\text{N}_3\text{O}$ |
| fw                              | 266.41                                                      |
| temp (K)                        | 296(2)                                                      |
| cryst syst                      | Tetragonal                                                  |
| Space group                     | $P-4_32_12$                                                 |
| $a$ (Å)                         | 10.7413(3)                                                  |
| $b$ (Å)                         | 10.7413(3)                                                  |
| $c$ (Å)                         | 20.7748(13)                                                 |
| $\alpha = \beta = \gamma$ (°)   | 90                                                          |
| $V$ (Å <sup>3</sup> )           | 2396.9(2)                                                   |
| $Z$                             | 8                                                           |
| $\rho$ (Mg/m <sup>3</sup> )     | 1.477                                                       |
| Abs coeff (mm <sup>-1</sup> )   | 0.943                                                       |
| $F(000)$                        | 1064                                                        |
| GOF                             | 1.069                                                       |
| $R_1/wR_2$ [ $I > 2\sigma(I)$ ] | 0.0240/0.0620                                               |
| $R_1/wR_2$ (all data)           | 0.0244/0.0623                                               |

**Table S2** Selected bond lengths (Å) and angles (°) for Cd-P.

| Bond lengths (Å)    |            |                     |            |
|---------------------|------------|---------------------|------------|
| Cd(1)-N(1)#1        | 2.269(3)   | Cd(1)-N(1)          | 2.269(3)   |
| Cd(1)-N(2)#2        | 2.280(3)   | Cd(1)-N(2)#3        | 2.280(3)   |
| Cd(1)-O(1)#1        | 2.501(3)   | Cd(1)-O(1)          | 2.501(3)   |
| N(2)-Cd(1)#4        | 2.280(3)   |                     |            |
| Bond angles (°)     |            |                     |            |
| N(1)#1-Cd(1)-N(1)   | 101.05(18) | N(1)#1-Cd(1)-N(2)#2 | 141.02(11) |
| N(1)-Cd(1)-N(2)#2   | 95.08(14)  | N(1)#1-Cd(1)-N(2)#3 | 95.08(14)  |
| N(1)-Cd(1)-N(2)#3   | 141.02(11) | N(2)#2-Cd(1)-N(2)#3 | 94.16(19)  |
| N(1)#1-Cd(1)-O(1)#1 | 55.88(10)  | N(1)-Cd(1)-O(1)#1   | 127.90(11) |
| N(2)#2-Cd(1)-O(1)#1 | 86.29(10)  | N(2)#3-Cd(1)-O(1)#1 | 90.43(11)  |
| N(1)#1-Cd(1)-O(1)   | 127.90(11) | N(1)-Cd(1)-O(1)     | 55.88(10)  |
| N(2)#2-Cd(1)-O(1)   | 90.43(11)  | N(2)#3-Cd(1)-O(1)   | 86.29(10)  |
| O(1)#1-Cd(1)-O(1)   | 175.18(14) |                     |            |

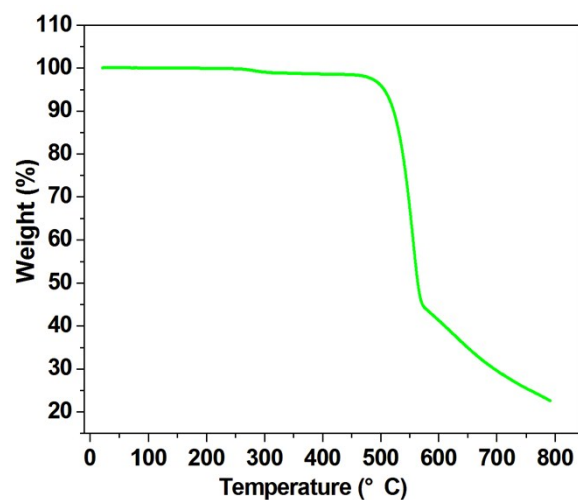

**Fig. S2** Thermogravimetric curve of Cd-P.

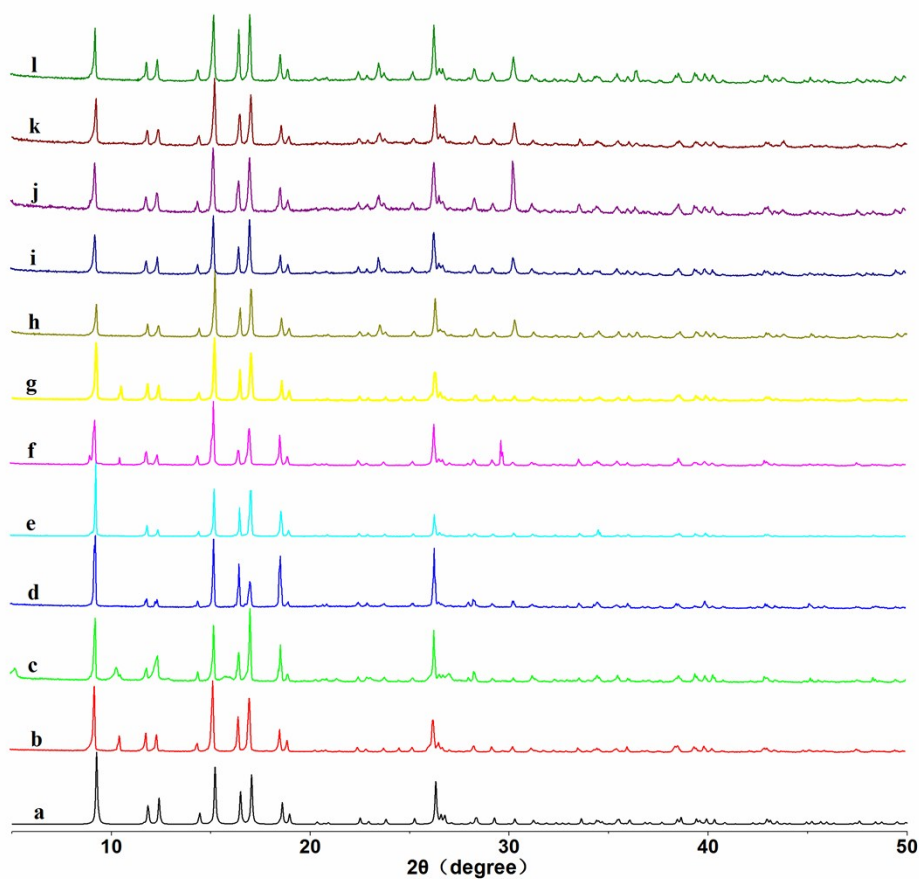

**Fig. S3** PXR D patterns for Cd-P: (a) simulated; (b) experimental; (c) 3 days after immersion in water; (d) 3 days after immersion in FeCl<sub>3</sub> solution (e) 3 days after immersion in CoCl<sub>2</sub> solution; (f) 3 days after immersion in NiCl<sub>2</sub> solution; (g) 3 days after immersion in CuCl<sub>2</sub> solution; (h) 3 days after immersion in CH<sub>3</sub>OH; (i) 3 days after immersion in C<sub>2</sub>H<sub>5</sub>OH; (j) 3 days after immersion in acetone; (k) 3 days after immersion in CH<sub>2</sub>Cl<sub>2</sub>; (l) 3 days after immersion in DMF.

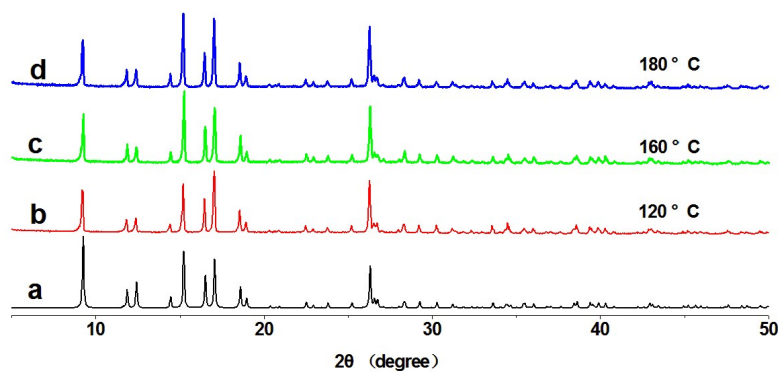

**Fig. S4** PXR D patterns for Cd-P at different temperatures, 120°C (red line); 160°C (green line); 180°C (blue line) and the simulated one calculated from the single crystal structure analysis (black line).

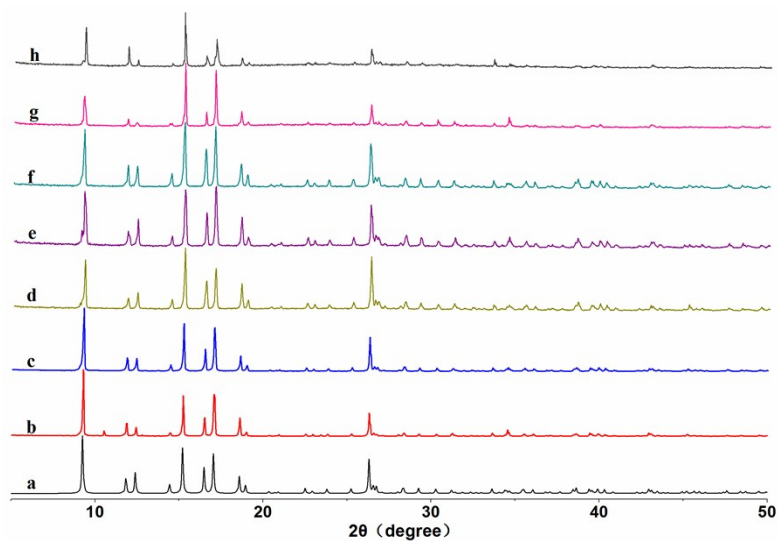

**Fig. S5** PXRD patterns for  $\text{Tb}^{3+}@\text{Cd-P}$ : (a) simulated of Cd-P; (b) experimental of Cd-P; (c) experimental of  $\text{Tb}^{3+}@\text{Cd-P}$ ; (d) experimental of  $\text{Tb}^{3+}@\text{Cd-P}$  first 12 h after immersion in  $\text{FeCl}_3$  solution; (e) experimental of  $\text{Tb}^{3+}@\text{Cd-P}$  second 12 h after immersion in  $\text{FeCl}_3$  solution; (f) experimental of  $\text{Tb}^{3+}@\text{Cd-P}$  third 12 h after immersion in  $\text{FeCl}_3$  solution; (g) experimental of  $\text{Tb}^{3+}@\text{Cd-P}$  fourth 12 h after immersion in  $\text{FeCl}_3$  solution; (h) experimental of  $\text{Tb}^{3+}@\text{Cd-P}$  fifth 12 h after immersion in  $\text{FeCl}_3$  solution.

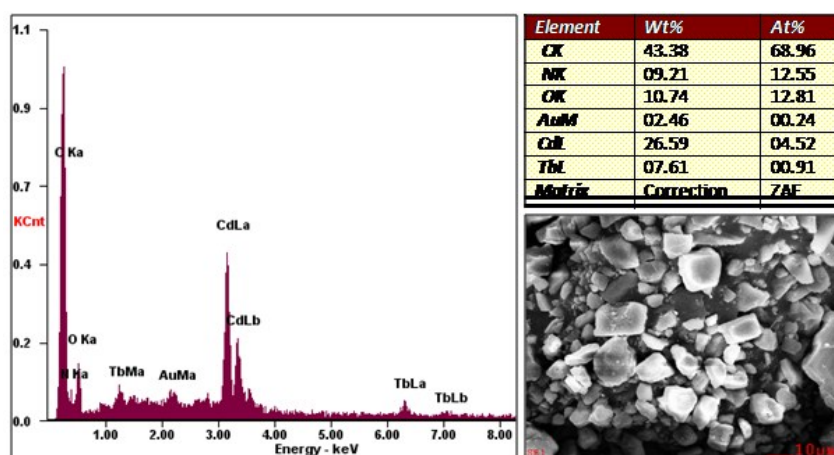

**Fig. S6** SEM images and Elemental analysis by EDS of  $\text{Tb}^{3+}@\text{Cd-P}$ .

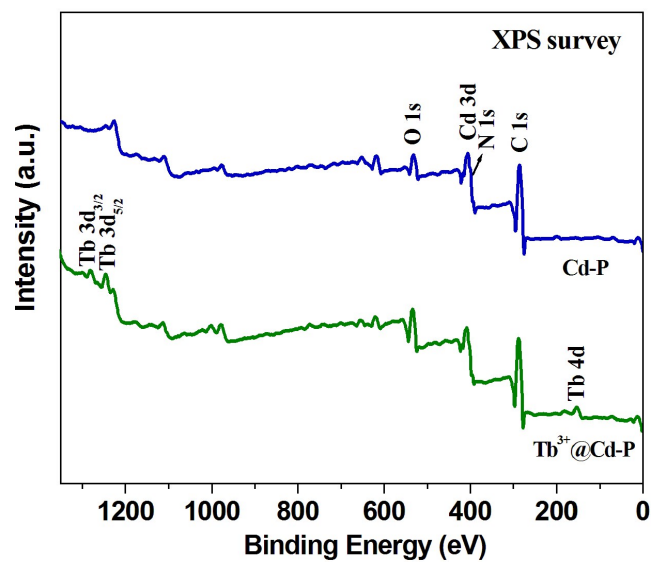

Fig. S7 XPS survey spectra of the Cd-P and Tb<sup>3+</sup>@Cd-P samples.

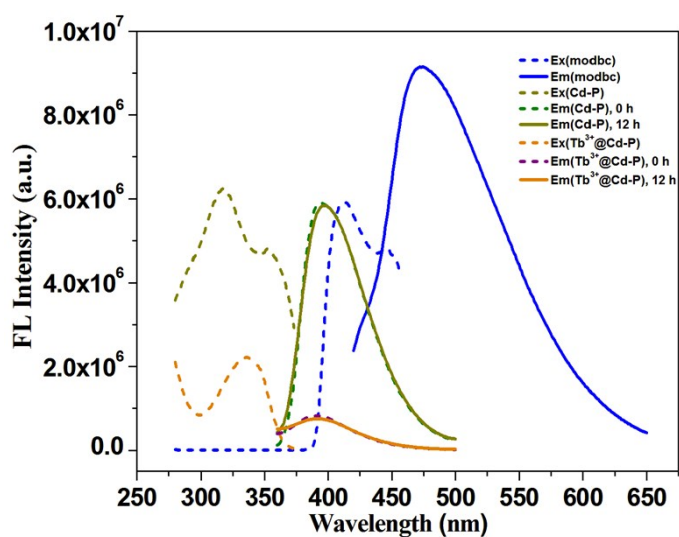

Fig. S8 liquid-state luminescent spectra of modbc ligand (blue), Cd-P (green and yellow), Tb<sup>3+</sup>@Cd-P (orange and purple) in 5 mM Tris-HCl/NaCl buffer (pH 7.0). slit width: 4 nm.

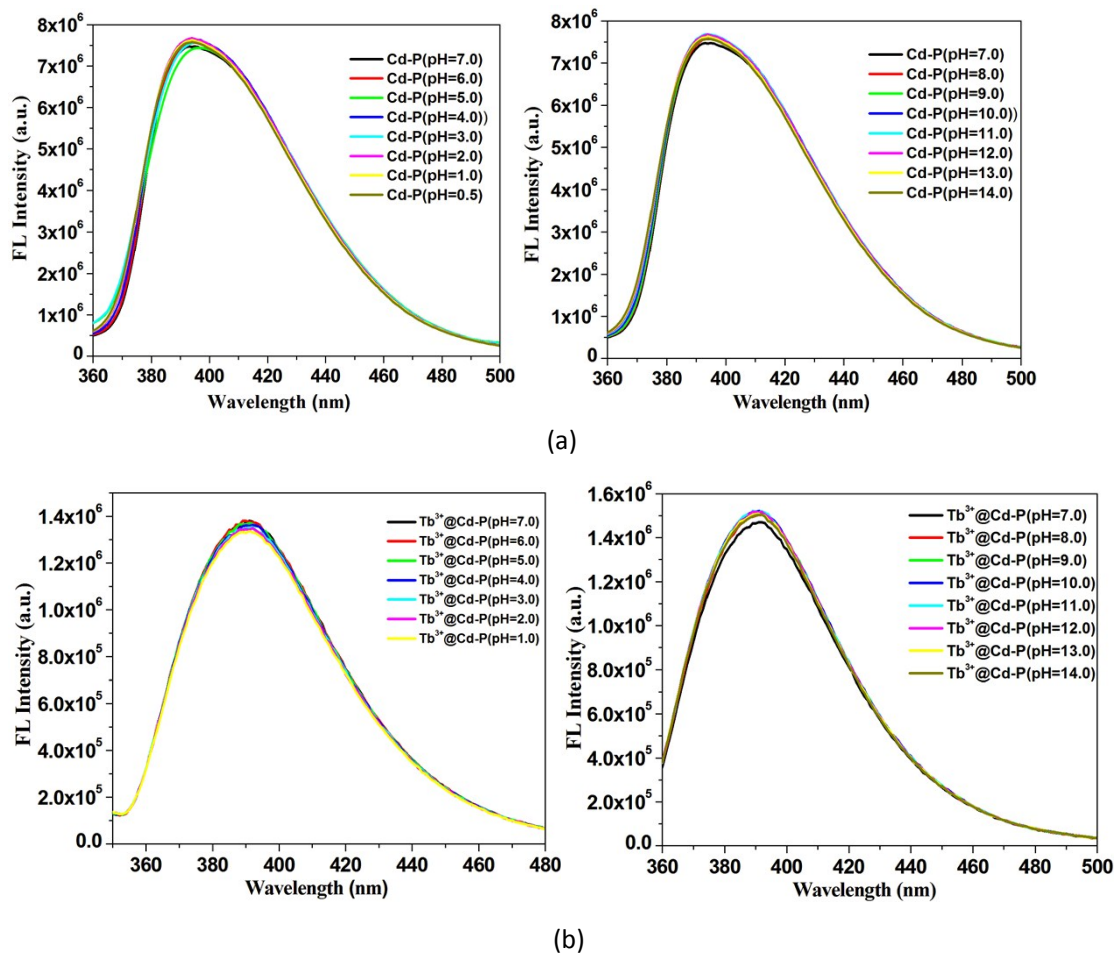

**Fig. S9** (a) Liquid-state luminescent spectra of Cd-P with different pH values (0.5~14.0) in 5 mM Tris-HCl/NaCl buffer (pH 7.0).  $\lambda_{\text{ex}}$ : 318 nm,  $\lambda_{\text{f}}$ : 400 nm, slit width: 4 nm. (b) Tb<sup>3+</sup>@Cd-P with different pH values (0.5~14.0) in 5 mM Tris-HCl/NaCl buffer (pH 7.0).  $\lambda_{\text{ex}}$ : 328 nm,  $\lambda_{\text{f}}$ : 390 nm, slit width: 4 nm.

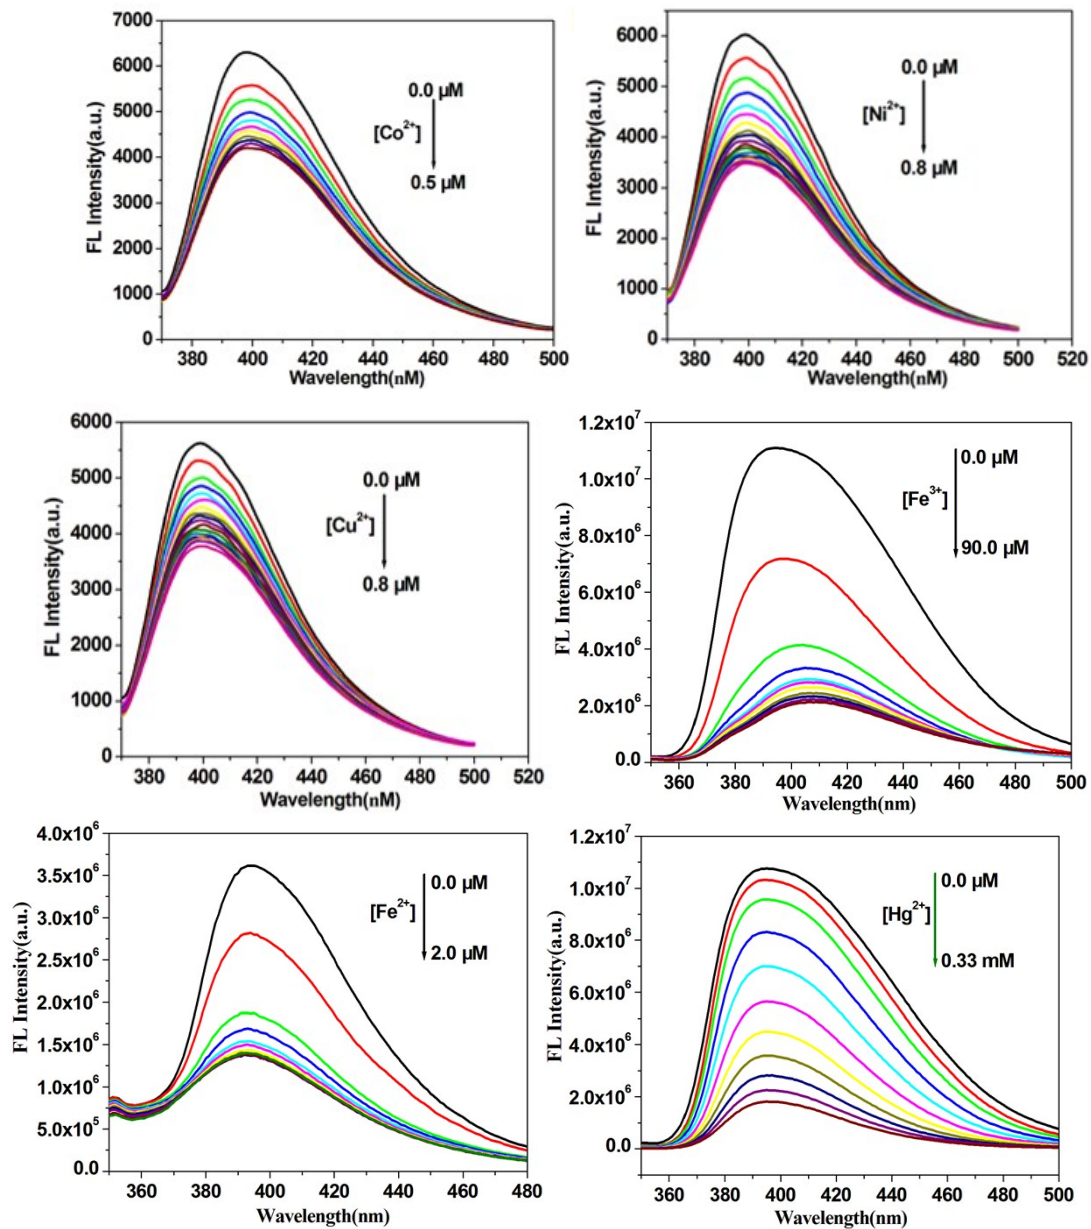

**Fig. S10** Luminescence quenching of Cd-P in 5 mM Tris-HCl/NaCl buffer (pH 7.0) with gradual addition of 1 mM solution of Co<sup>2+</sup>, Ni<sup>2+</sup>, Fe<sup>3+</sup>, Hg<sup>2+</sup>, Fe<sup>2+</sup> and Cu<sup>2+</sup> ions, respectively.  $\lambda_{\text{ex}}$ : 318 nm,  $\lambda_{\text{F}}$ : 400 nm, slit width: 4 nm.



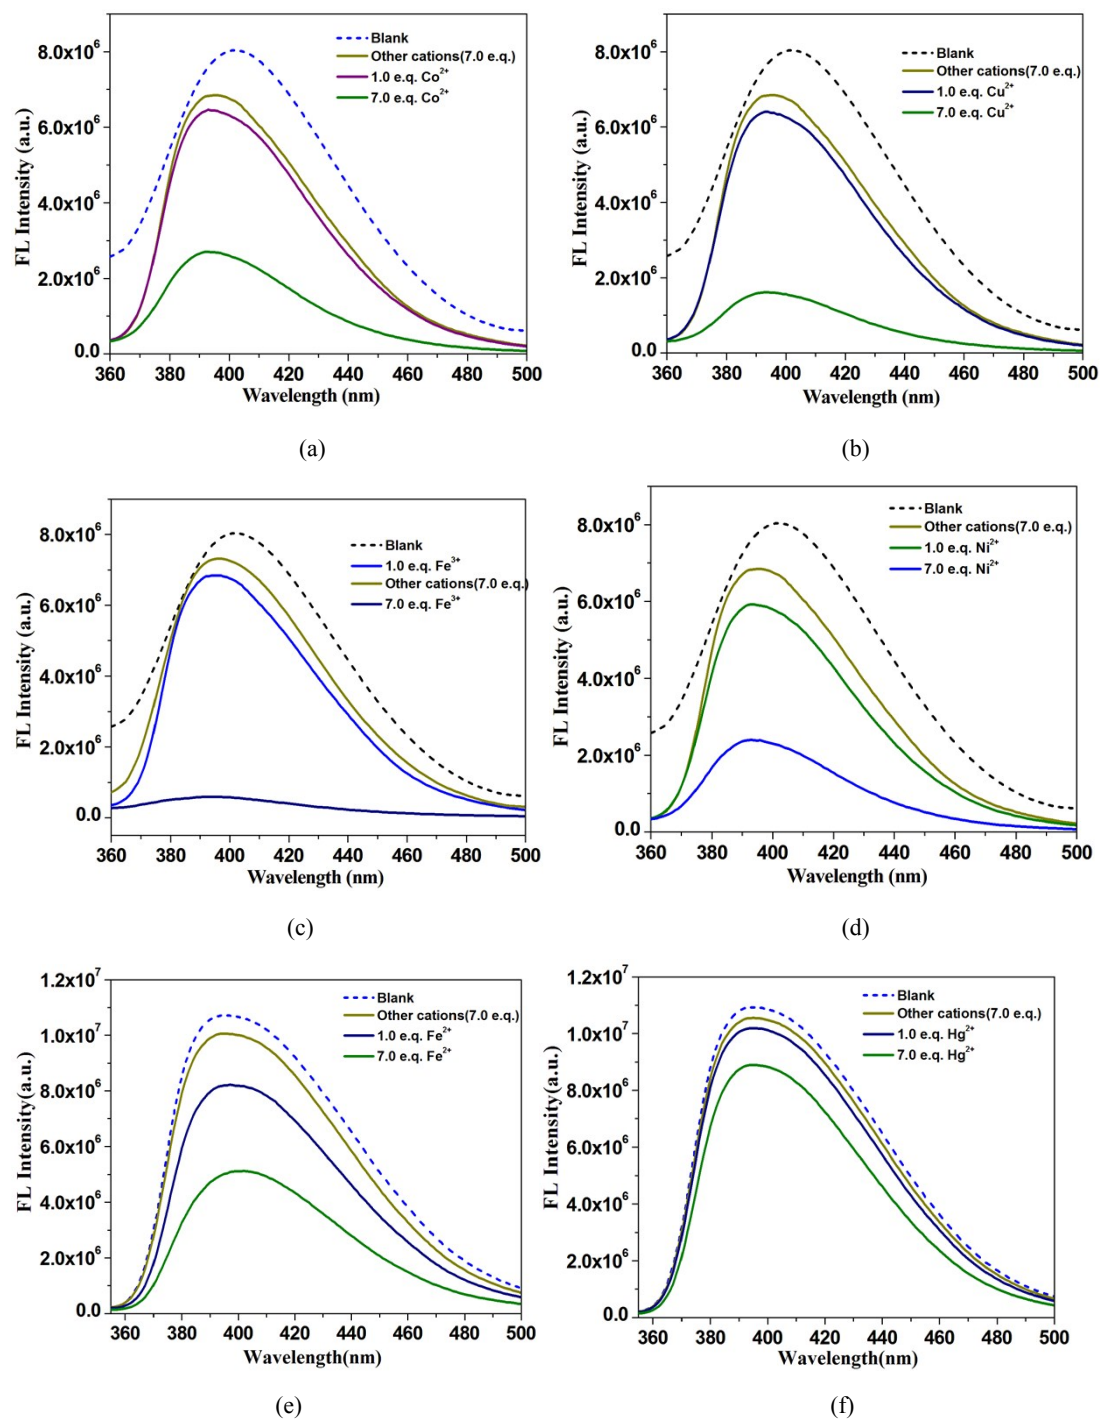

**Fig. S11** (a–f) The relative fluorescence intensity of a  $10^{-5}$  M solution of Cd-P upon addition of 1.0 and 7.0 equiv of  $\text{Co}^{2+}$  ions,  $\text{Cu}^{2+}$  ions,  $\text{Fe}^{3+}$  ions,  $\text{Ni}^{2+}$  ions,  $\text{Fe}^{2+}$  ions and  $\text{Hg}^{2+}$  ions in the presence of 7.0 equiv of background ions ( $\text{M}^{\text{n}+}$ ) in 5 mM Tris-HCl/NaCl buffer (pH 7.0) with pH 7.0.  $\lambda_{\text{ex}}$ : 318 nm,  $\lambda_{\text{F}}$ : 400 nm, slit width: 4 nm.

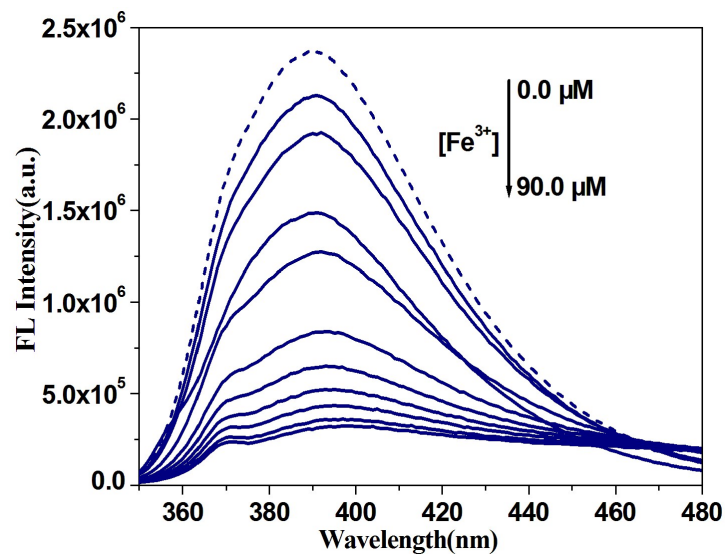

**Fig. S12** Luminescence quenching of  $\text{Tb}^{3+}@\text{Cd-P}$  in 5 mM Tris-HCl/NaCl buffer (pH 7.0) with gradual addition of 1 mM solution of  $\text{Fe}^{3+}$  ions.  $\lambda_{\text{ex}}$ : 328 nm,  $\lambda_{\text{F}}$ : 390 nm, slit width: 4 nm.

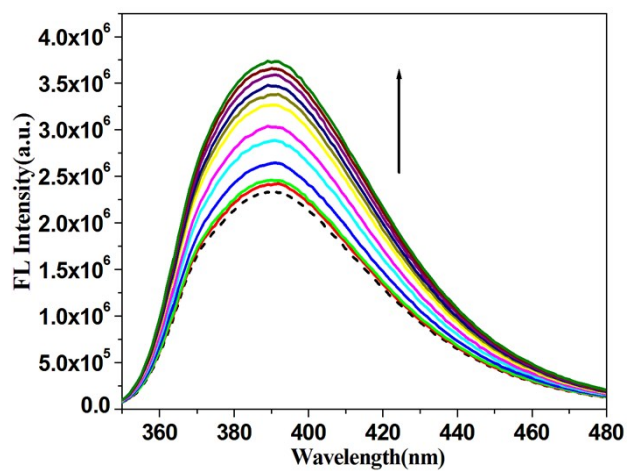

**Fig. S13** Luminescence enhancement of  $\text{Tb}^{3+}@\text{Cd-P}$  in 5 mM Tris-HCl/NaCl buffer (pH 7.0) with gradual addition of 1 mM solution of  $\text{Fe}^{2+}$  ions.  $\lambda_{\text{ex}}$ : 328 nm,  $\lambda_{\text{F}}$ : 390 nm, slit width: 4 nm.

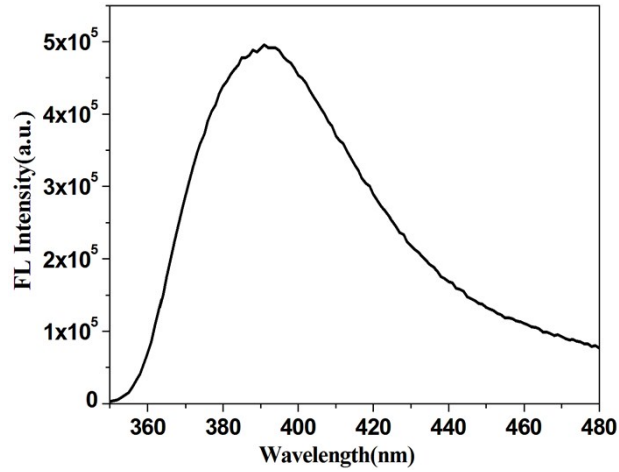

Fig. S14 liquid-state luminescent spectrum of  $(\text{NH}_4)_2\text{Fe}(\text{SO}_4)_2$  in  $\text{H}_2\text{O}$ .

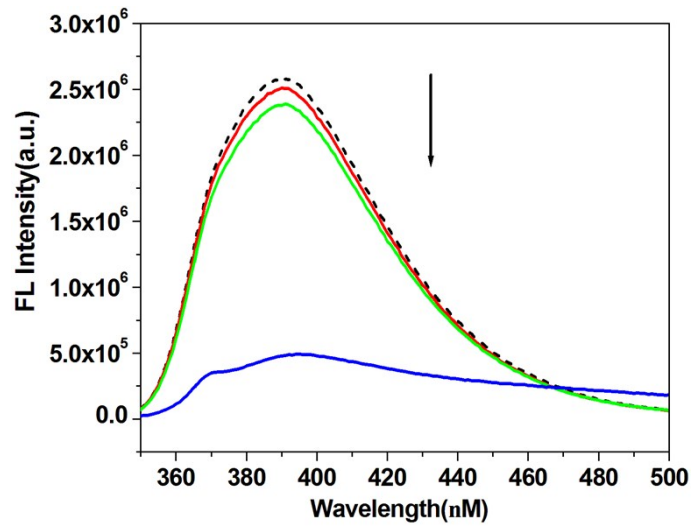

Fig. S15 Comparison of the luminescence intensity of  $\text{Tb}^{3+}@\text{Cd-P}$  in 5 mM Tris-HCl/NaCl buffer (pH 7.0): after addition of mixed ions ( $\text{Na}^+$ ,  $\text{Ag}^+$ ,  $\text{Cd}^{2+}$ ,  $\text{Zn}^{2+}$ ,  $\text{Pb}^{2+}$ ,  $\text{Ca}^{2+}$ ,  $\text{Cu}^{2+}$ ,  $\text{Co}^{2+}$ ,  $\text{Ni}^{2+}$ ,  $\text{Sn}^{2+}$ ,  $\text{Mg}^{2+}$ ,  $\text{Hg}^{2+}$ ,  $\text{Fe}^{2+}$ ,  $\text{Mn}^{2+}$ ; total concentration of mixed metal ions is 70  $\mu\text{M}$ ), and followed by addition of  $\text{Fe}^{3+}$  ions ( $[\text{Fe}^{3+}] = 5$  or 70  $\mu\text{M}$ ).  $\lambda_{\text{ex}}$ : 328 nm,  $\lambda_{\text{f}}$ : 390 nm, slit width: 4 nm.

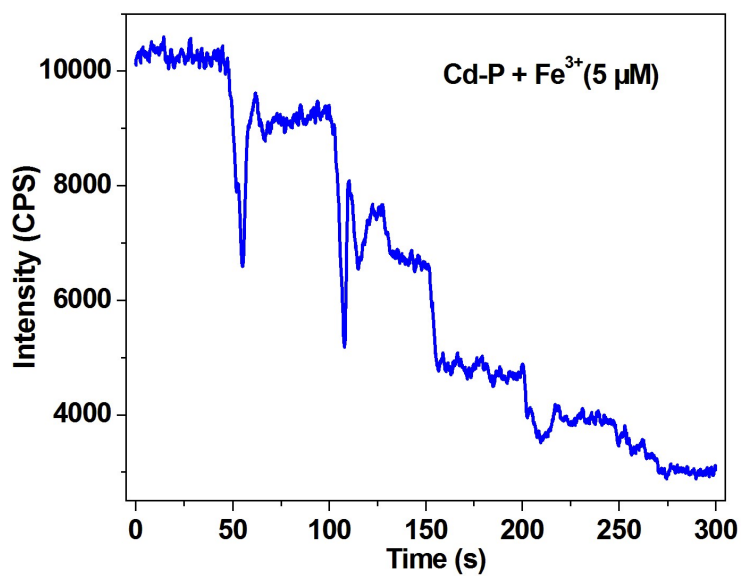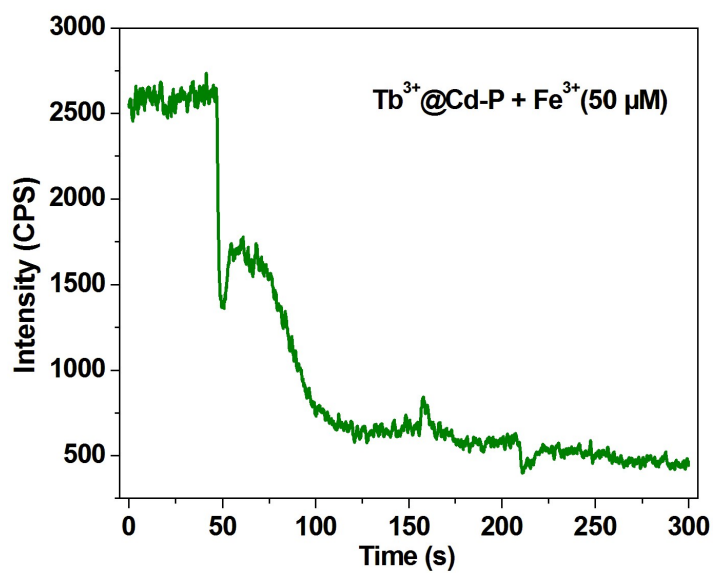

**Fig. S16** The variation of luminescent intensity of Cd-P at 400 nm with immersion time in 5 μM Fe(NO<sub>3</sub>)<sub>3</sub> aqueous solution (blue); Tb<sup>3+</sup>@Cd-P at 390 nm with immersion time in 50 μM Fe(NO<sub>3</sub>)<sub>3</sub> aqueous solution (olive).

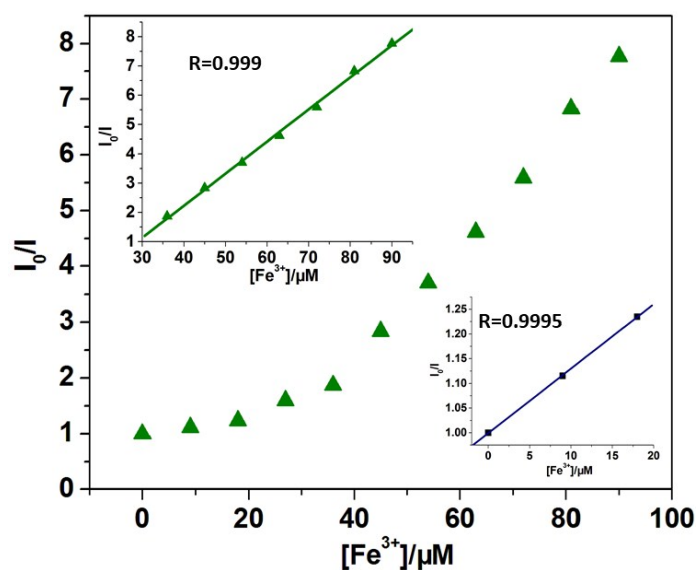

**Fig. S17**  $I_0/I$  of  $Tb^{3+}@Cd-P$  versus  $Fe^{3+}$  ions concentration.  $\lambda_{ex}$ : 328 nm,  $\lambda_F$ : 390 nm, slit width: 4 nm.

**Table S3.** Comparison of the probes with literature reports for sensing  $Fe^{3+}$ .

| S. No | Probe                                        | LOD (M)                | Ref       |
|-------|----------------------------------------------|------------------------|-----------|
| 1     | Mg-CP probe                                  | $4.7 \times 10^{-4}$   | S1        |
| 2     | Zn-L-MOF probe                               | $6.4 \times 10^{-6}$   | S2        |
| 3     | Zn(II)-based MOF probe                       | $2 \times 10^{-6}$     | S3        |
| 4     | Ln(III)-MOF probe                            | $10^{-6}$              | S4        |
| 5     | Europium-Based MOF probe                     | $0.793 \times 10^{-6}$ | S5        |
| 6     | $\{[Eu(Hdcpa)(H_2O)_2] \cdot H_2O\}_n$ probe | $10^{-6}$              | S6        |
| 7     | $Tb^{3+}@Cd-P$ probe                         | $6.6 \times 10^{-7}$   | This work |
| 8     | Cd-P probe                                   | $4.7 \times 10^{-8}$   | This work |

S1. Wu, Z. F.; Gong, L. K.; Huang, X. Y. A Mg-CP with in Situ Encapsulated Photochromic Guest as Sensitive Fluorescence Sensor for  $Fe^{3+}/Cr^{3+}$  Ions and Nitro-Explosives. *Inorg. Chem.* **2017**, *56*, 7397–7403.

S2. Yu, C. Y.; Sun, X. D.; Zou, L. F.; Li, G. H.; Zhang, L. R.; Liu, Y. L. A Pillar-Layered Zn-LMOF with Uncoordinated Carboxylic Acid Sites: High Performance for Luminescence Sensing  $Fe^{3+}$  and TNP. *Inorg. Chem.* **2019**, *58*, 4026–4032.

S3. Lv, R.; Li, H.; Su, J.; Fu, X.; Yang, B. Y.; Gu, W.; Liu, X. Zinc Metal–Organic Framework for Selective Detection and Differentiation of Fe(III) and Cr(VI) Ions in Aqueous Solution. *Inorg. Chem.* **2017**, *56*, 12348–12356.

S4. Zhang, Q. S.; Wang, J.; Alexander, M. K.; Dou, W.; Xu, C.; Xu, C. L.; Yang, L. Z.; Fang, R.; Liu, W. S. Multifunctional Ln–MOF Luminescent Probe for Efficient Sensing of  $\text{Fe}^{3+}$ ,  $\text{Ce}^{3+}$ , Acetone. *ACS Appl. Mater. Interfaces*. **2018**, *10*, 23976–23986.

S5. Purna, C. R.; Mandal, S. Europium-Based Metal–Organic Framework as a Dual Luminescence Sensor for the Selective Detection of the Phosphate Anion and  $\text{Fe}^{3+}$  Ion in Aqueous Media. *Inorg. Chem.* **2018**, *57*, 11855–11858

S6. Zhang, H. J.; Fan, R. Q.; Chen, W.; Fan, J. Z.; Dong, Y. W.; Song, Y.; Du, X.; Wang, P.; Yang, Y. L. 3D Lanthanide Metal–Organic Frameworks Based on Mono-, Tri-, and Heterometallic Tetranuclear Clusters as Highly Selective and Sensitive Luminescent Sensor for  $\text{Fe}^{3+}$  and  $\text{Cu}^{2+}$  Ions. *Cryst. Growth Des.* **2016**, *16*, 5429–5440.

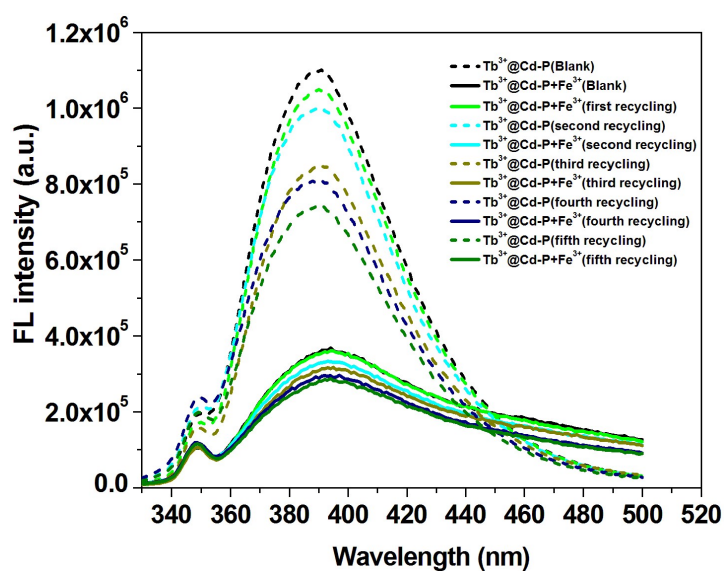

**Fig. S18** Five regeneration cycles for detection of  $\text{Fe}^{3+}$  ions by  $\text{Tb}^{3+}$ @Cd-P.  $\lambda_{\text{ex}}$ : 328 nm,  $\lambda_{\text{F}}$ : 390 nm, slit width: 4 nm.

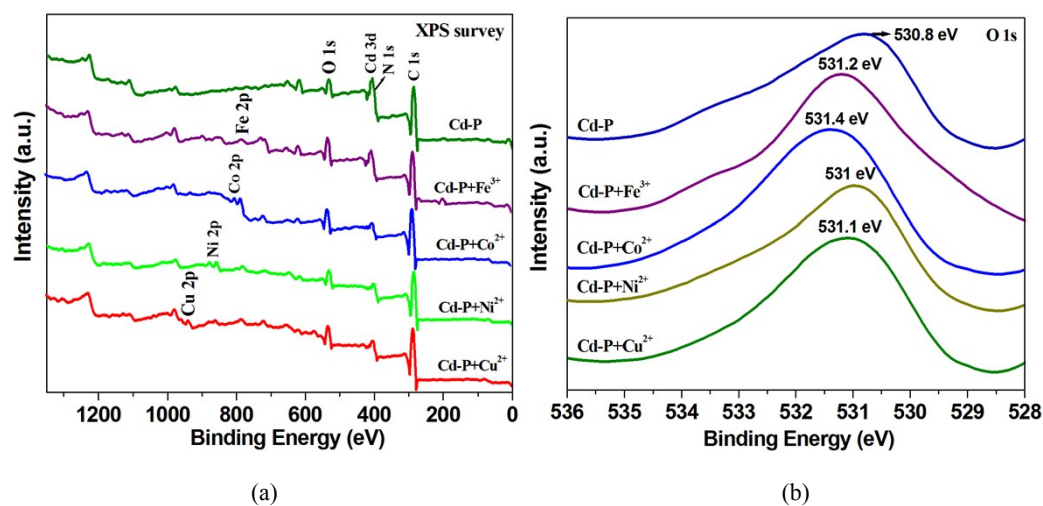

**Fig. S19** XPS spectra of Cd-P, and after added  $\text{Cu}^{2+}$ ,  $\text{Co}^{2+}$ ,  $\text{Ni}^{2+}$ ,  $\text{Fe}^{3+}$  samples: (a) the survey spectrum, and (b) the high resolution XPS spectra of O 1s.

**Table S4** The detailed ICP studies of Cd-P and  $\text{Tb}^{3+}@/\text{Cd-P}$ .

| Sample                                       | $\text{Tb}^{3+}$ (ppm) | $\text{Hg}^{2+}$ (ppm) | $\text{Sm}^{3+}$ (ppm) | $\text{Fe}^{3+}$ (ppm) | $\text{Cr}^{3+}$ (ppm) | $\text{Eu}^{3+}$ (ppm) | $\text{Cu}^{2+}$ (ppm) | $\text{Co}^{3+}$ (ppm) |
|----------------------------------------------|------------------------|------------------------|------------------------|------------------------|------------------------|------------------------|------------------------|------------------------|
| $\text{Tb}^{3+}@/\text{Cd-P}$                | Below detection limit  |                        |                        |                        |                        |                        |                        |                        |
| Cd-P+ $\text{Cu}^{2+}$                       |                        |                        |                        |                        |                        |                        | 0.0656                 |                        |
| Cd-P+ $\text{Fe}^{3+}$                       |                        |                        |                        | 0.3564                 |                        |                        |                        |                        |
| Cd-P+ $\text{Hg}^{2+}$                       |                        | 0.0077                 |                        |                        |                        |                        |                        |                        |
| Cd-P+ $\text{Co}^{3+}$                       |                        |                        |                        |                        |                        |                        |                        | 0.0933                 |
| Cd-P+ $\text{Sm}^{3+}$                       |                        |                        | Below detection limit  |                        |                        |                        |                        |                        |
| Cd-P+ $\text{Eu}^{3+}$                       |                        |                        |                        |                        |                        | Below detection limit  |                        |                        |
| Cd-P+ $\text{Cr}^{3+}$                       |                        |                        |                        |                        | 0.1696                 |                        |                        |                        |
| $\text{Tb}^{3+}@/\text{Cd-P}+\text{Fe}^{3+}$ | Below detection limit  |                        |                        | 0.0489                 |                        |                        |                        |                        |
| detection limit / ppm                        | 0.03                   |                        | 0.05                   |                        |                        | 0.01                   |                        |                        |

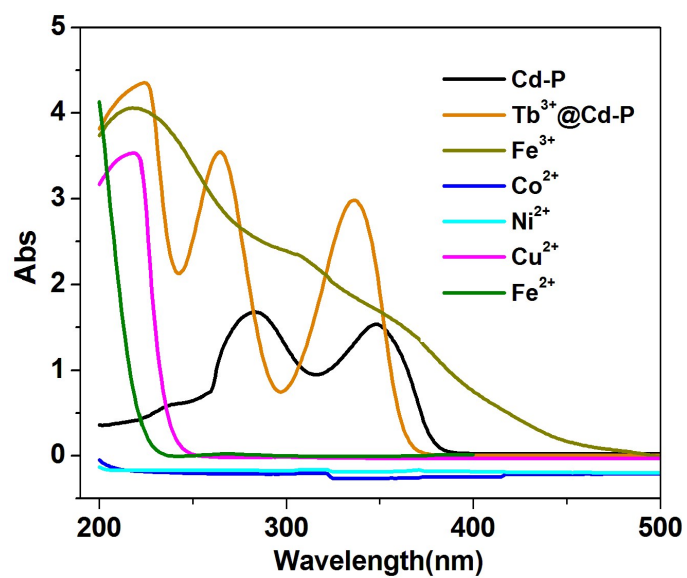

Fig. S20 UV spectra of Cu<sup>2+</sup>, Fe<sup>3+</sup>, Fe<sup>2+</sup>, Co<sup>2+</sup>, Ni<sup>2+</sup>, Cd-P and Tb<sup>3+</sup>@Cd-P in DMF-DMSO (3:1).

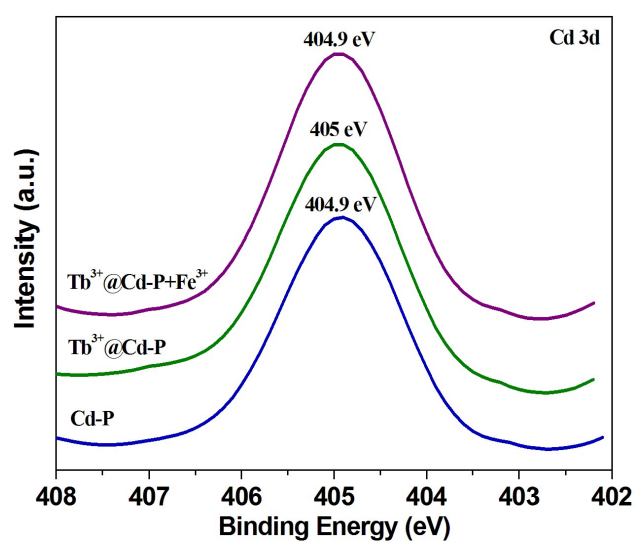

Fig. S21 The high resolution XPS spectra for Cd-P, Tb<sup>3+</sup>@Cd-P and Tb<sup>3+</sup>@Cd-P+Fe<sup>3+</sup> samples of Cd 3d.



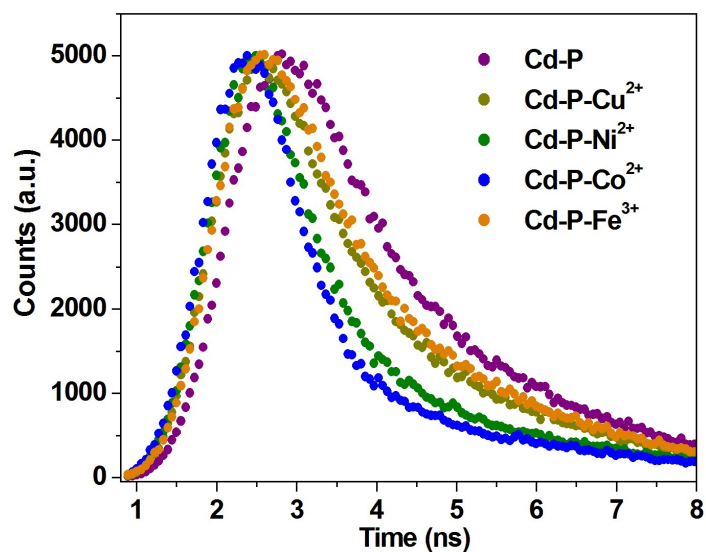

**Fig. S22** Temporal fluorescence decay of 100  $\mu\text{M}$  Cd-P with 100  $\mu\text{M}$  Cu<sup>2+</sup>, Co<sup>2+</sup>, Ni<sup>2+</sup> and Fe<sup>3+</sup> in 5 mM Tris-HCl/NaCl buffer (pH 7.0) excited at 318 nm and monitored at 400 nm; The data are obtained at 54.9 ps per point.

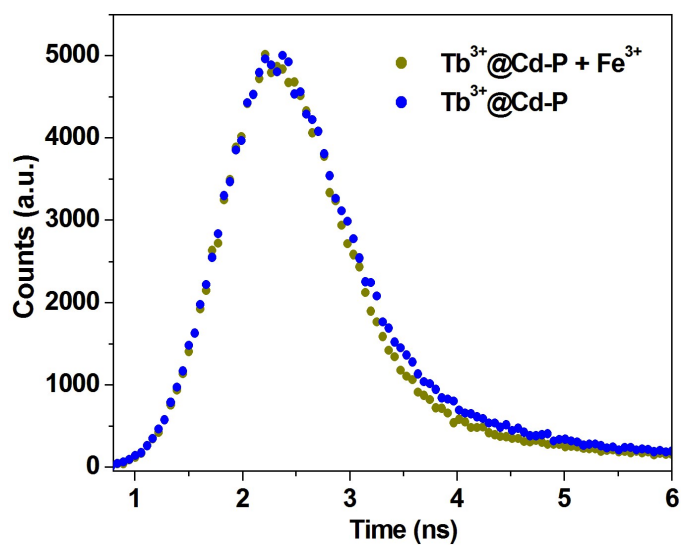

**Fig. S23** Temporal fluorescence decay of 100  $\mu\text{M}$  Tb<sup>3+</sup>@Cd-P with 100  $\mu\text{M}$  Fe<sup>3+</sup> in 5 mM Tris-HCl/NaCl buffer (pH 7.0) excited at 328 nm and monitored at 390 nm; The data are obtained at 54.9 ps per point.

**Table S5** Comparison of lifetimes of Cd-P, Cd-P-Cu<sup>2+</sup>, Cd-P-Fe<sup>3+</sup>, Cd-P-Co<sup>2+</sup>, Cd-P-Ni<sup>2+</sup>,  
Tb<sup>3+</sup>@Cd-P and Tb<sup>3+</sup>@Cd-P-Fe<sup>3+</sup>.

| CPS                                     | $\tau_1$ (ns) | B <sub>1</sub> (%) | $\tau_2$ (ns) | B <sub>2</sub> (%) | $\tau$ (ns) |
|-----------------------------------------|---------------|--------------------|---------------|--------------------|-------------|
| Cd-P                                    | 24            | 4.58               | 1.95          | 95.42              | 2.960       |
| Cd-P-Cu <sup>2+</sup>                   | 0.68          | 31.57              | 2.59          | 68.43              | 1.987       |
| Cd-P-Fe <sup>3+</sup>                   | 0.93          | 26.74              | 3.42          | 73.26              | 2.754       |
| Cd-P-Co <sup>2+</sup>                   | 1.13          | 34.95              | 2.38          | 65.05              | 1.943       |
| Cd-P-Ni <sup>2+</sup>                   | 1.12          | 28.39              | 2.32          | 71.61              | 1.979       |
| Tb <sup>3+</sup> @Cd-P                  | 0.54          | 47.45              | 2.22          | 52.55              | 1.423       |
| Tb <sup>3+</sup> @Cd-P-Fe <sup>3+</sup> | 0.52          | 56.87              | 2.34          | 43.13              | 1.305       |
